# Supplementary material for: Treatment Pathways and Prognosis in Advanced Sarcoma with Peritoneal Sarcomatosis
Source: MDPI journal article supplement (doi:10.3390/cancers15041340), 2023-02-20
Supplement: s1 [file s1]

**Table S1. Detailed patient characteristics**

| Patient | Age | Sex | Subtype | Primary origin            | Time to PS in months | Number of resections | Intention  | Additional therapy     | Complications                                                          | survival after PS in months |
|---------|-----|-----|---------|---------------------------|----------------------|----------------------|------------|------------------------|------------------------------------------------------------------------|-----------------------------|
| 1       | 67  | m   | NOS     | retropubic space          | 20                   | 7                    | curative   | CTX                    | impaired wound healing                                                 | 21                          |
| 2       | 81  | f   | NOS     | retroperitoneal space     | 63                   | 6                    | curative   | CTX, RTX               | burst abdomen                                                          | 3                           |
| 3       | 46  | m   | NOS     | peritoneal cavity         | 2                    | 1                    | palliative | none                   | pneumonia with fatal respiratory insufficiency, impaired wound healing | 0                           |
| 4       | 48  | f   | NOS     | uterus                    | 4                    | 10                   | palliative | CTX, RTX               | none                                                                   | 68                          |
| 5       | 88  | m   | NOS     | peritoneal cavity         | 2                    | 1                    | palliative | none                   | gastrojejunal stenosis                                                 | 12                          |
| 6       | 18  | f   | DSRCT   | peritoneal cavity/ovaries | 0                    | 1                    | curative   | CTX                    | impaired wound healing                                                 | 25                          |
| 7       | 18  | f   | DSRCT   | peritoneal cavity         | 20                   | 3                    | curative   | CTX , Hyperthermia     | impaired wound healing                                                 | 4                           |
| 8       | 18  | m   | DSRCT   | peritoneal cavity         | 0                    | 4                    | curative   | CTX , Hyperthermia     | kidney failure, hemorrhagic shock and gastric perforation              | 22                          |
| 9       | 24  | m   | DSRCT   | peritoneal cavity, liver  | 4                    | 3                    | curative   | CTX , Hyperthermia     | impaired wound healing                                                 | 20                          |
| 10      | 36  | f   | DLS     | retroperitoneal space     | 2                    | 1                    | palliative | CTX, Hyperthermia      | none                                                                   | 6                           |
| 11      | 84  | m   | DLS     | pelvic region             | 0                    | 1                    | palliative | none                   | fatal multiorgan failure                                               | 1                           |
| 12      | 65  | f   | DLS     | peritoneal cavity         | 19                   | 4                    | palliative | CTX, RTX, Hyperthermia | urinary sepsis                                                         | 2                           |
| 13      | 44  | m   | MLS     | gluteal region            | 46                   | 7                    | curative   | CTX, RTX, Hyperthermia | impaired wound healing                                                 | 30                          |
| 14      | 64  | m   | MLS     | thigh                     | 35                   | 3                    | palliative | CTX, RTX               | none                                                                   | 15                          |
| 15      | 44  | f   | LMS     | vaginal stump             | 0                    | 4                    | curative   | CTX , Hyperthermia     | none                                                                   | 207                         |

|           |    |   |       |               |    |   |            |                           |                                                |    |
|-----------|----|---|-------|---------------|----|---|------------|---------------------------|------------------------------------------------|----|
| <b>16</b> | 58 | f | LMS   | uterus        | 17 | 8 | curative   | CTX                       | none                                           | 82 |
| <b>17</b> | 24 | f | MPNST | pelvic region | 13 | 4 | curative   | CTX, RTX,<br>Hyperthermia | pleuraempyema and<br>hemothorax                | 2  |
| <b>18</b> | 68 | m | SFT   | pelvic region | 27 | 2 | curative   | none                      | anastomotic leak, respiratory<br>insufficiency | 43 |
| <b>19</b> | 26 | m | OS    | tibia         | 34 | 3 | palliative | CTX                       | pneumothorax after chest<br>tube removal       | 9  |

Peritoneal sarcomatosis (PS), pleomorphic sarcomas – not otherwise specified (NOS), Desmoplastic Small Round Cell Tumors (DSRCT), Dedifferentiated Liposarcoma (DLS), Myxoid Liposarcoma (MLS), Leiomyosarcoma (LMS), Malignant Peripheral Nerve Sheath Tumor (MPNST), Solitary fibrous tumor (SFT), Osteosarcoma (OS), Chemotherapy (CTX), Radiotherapy (RTX), Female (f), Male (m)
